# Supplementary material for: Treatment seeking behavior pathways of Cancer patients in public and private sector facilities: A Qualitative inquiry
Source: Research Square preprint supplement (doi:10.21203/rs.3.rs-6878371/v1), 2025-06-17
Supplement: Supplementary file 1 [file bd9ff4dbbbd00b887323f930.docx]

# Table 1 Symbols used to explain the health facility and patient journey during TSB.

# 
